# Supplementary material for: The virtue of training: extending phage host spectra against vancomycin-resistant Enterococcus faecium strains using the Appelmans method
Source: PubMed Central journal article supplement (PMC11210271; doi:10.1128/aac.01439-23), 2024-04-09
Supplement: aac.01439-23-s0001.pdf [file aac.01439-23-s0001.pdf]

## Supplemental figures

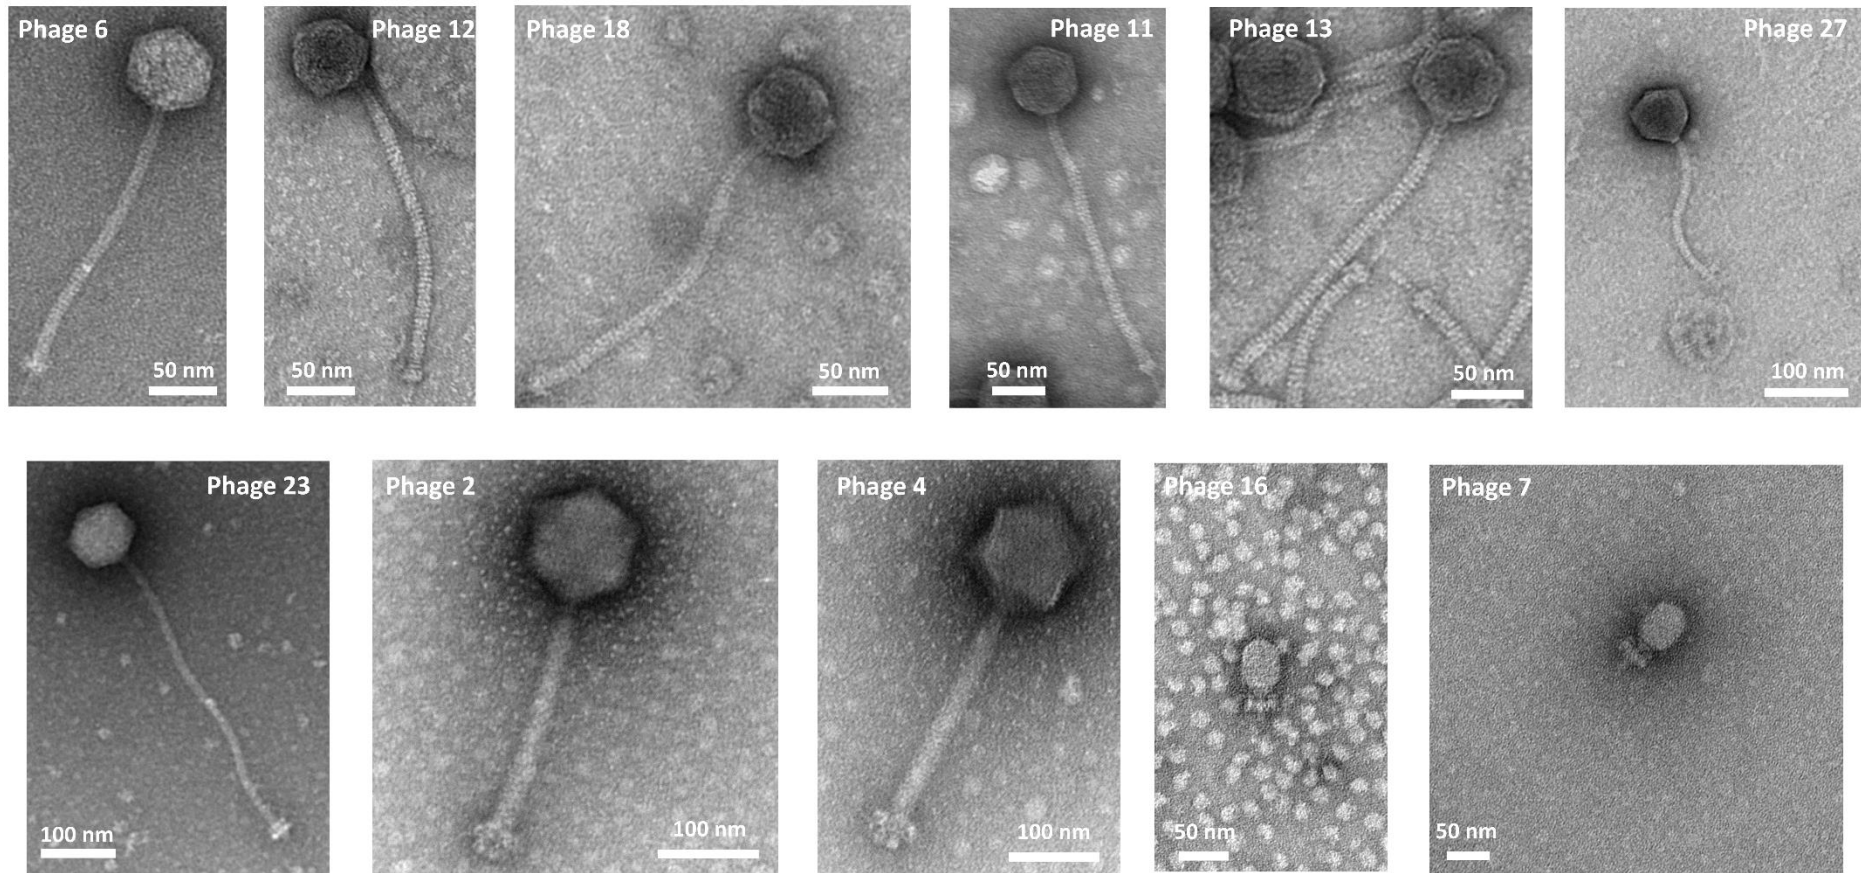

Figure S1. Examination of phages by transmission electron microscopy. All phages negatively stained with 1 % uranyl acetate belonged to the class of *Caudoviricetes*. Phage 6, phage 12, phage 18, phage 11, phage 13, phage 27 and phage 23 were siphophages. Phage 2 and phage 4 were myophages. Phage 16 and phage 7 were podophages.

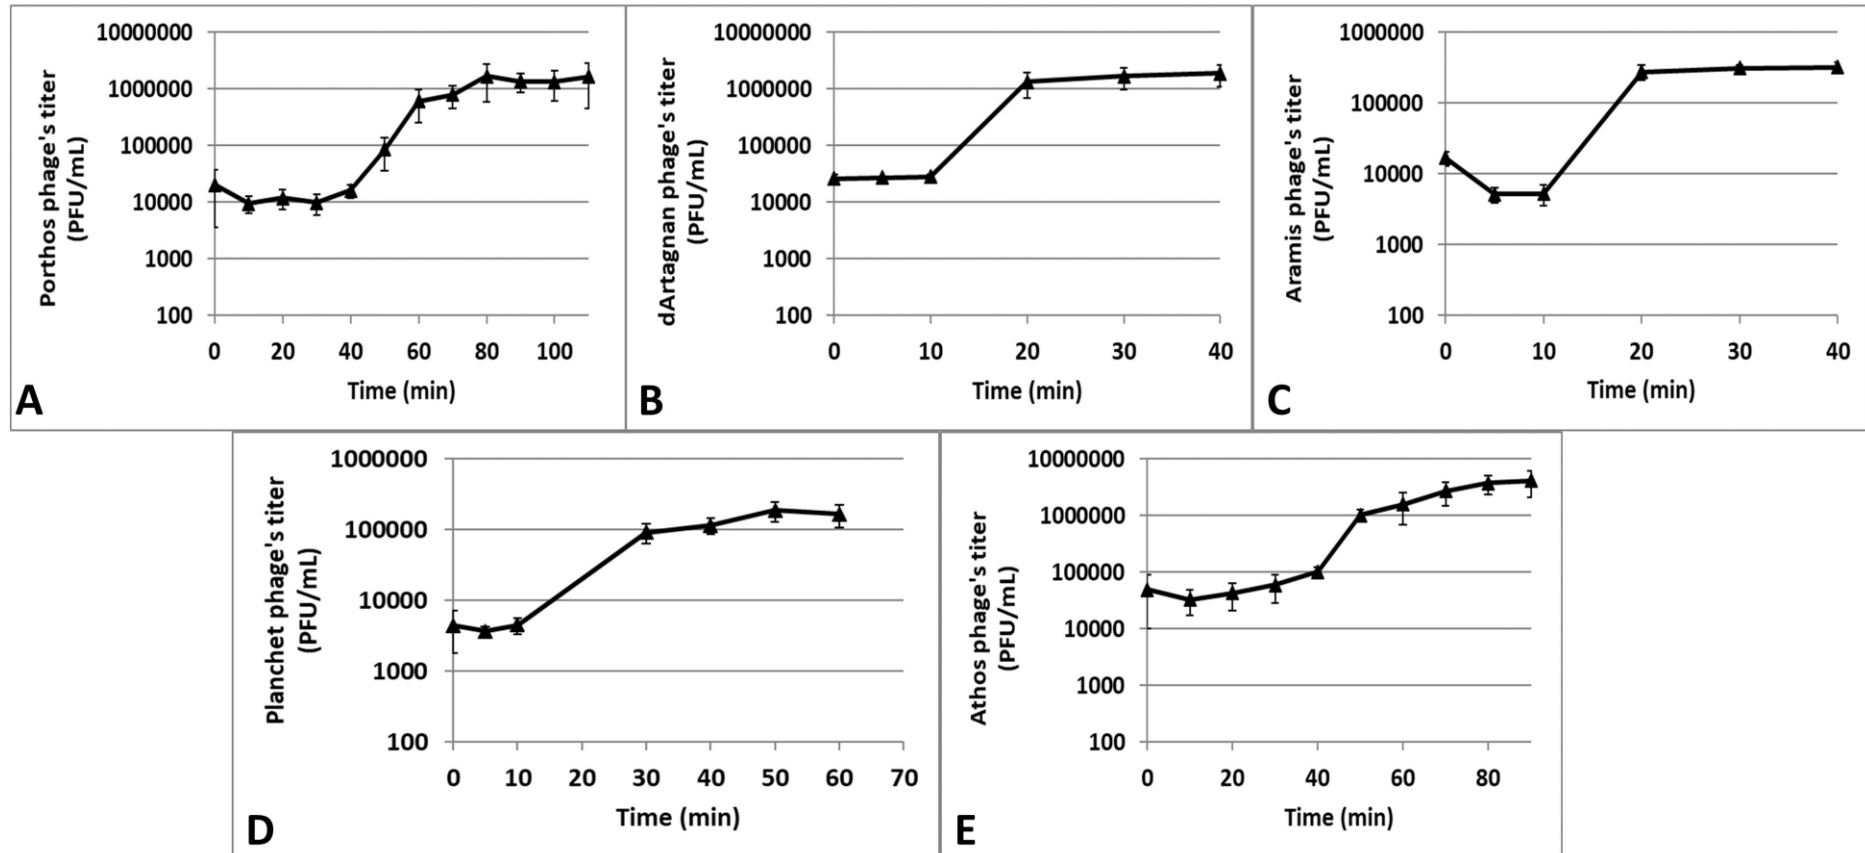

Figure S2 : One step growth kinetics of phages Porthos (A), dArtagnan (B), Aramis (C), Planchet (D) and Athos (E) on their respective isolation strains. For each kinetic, the values indicate the means and standard deviations of three independent experiments.

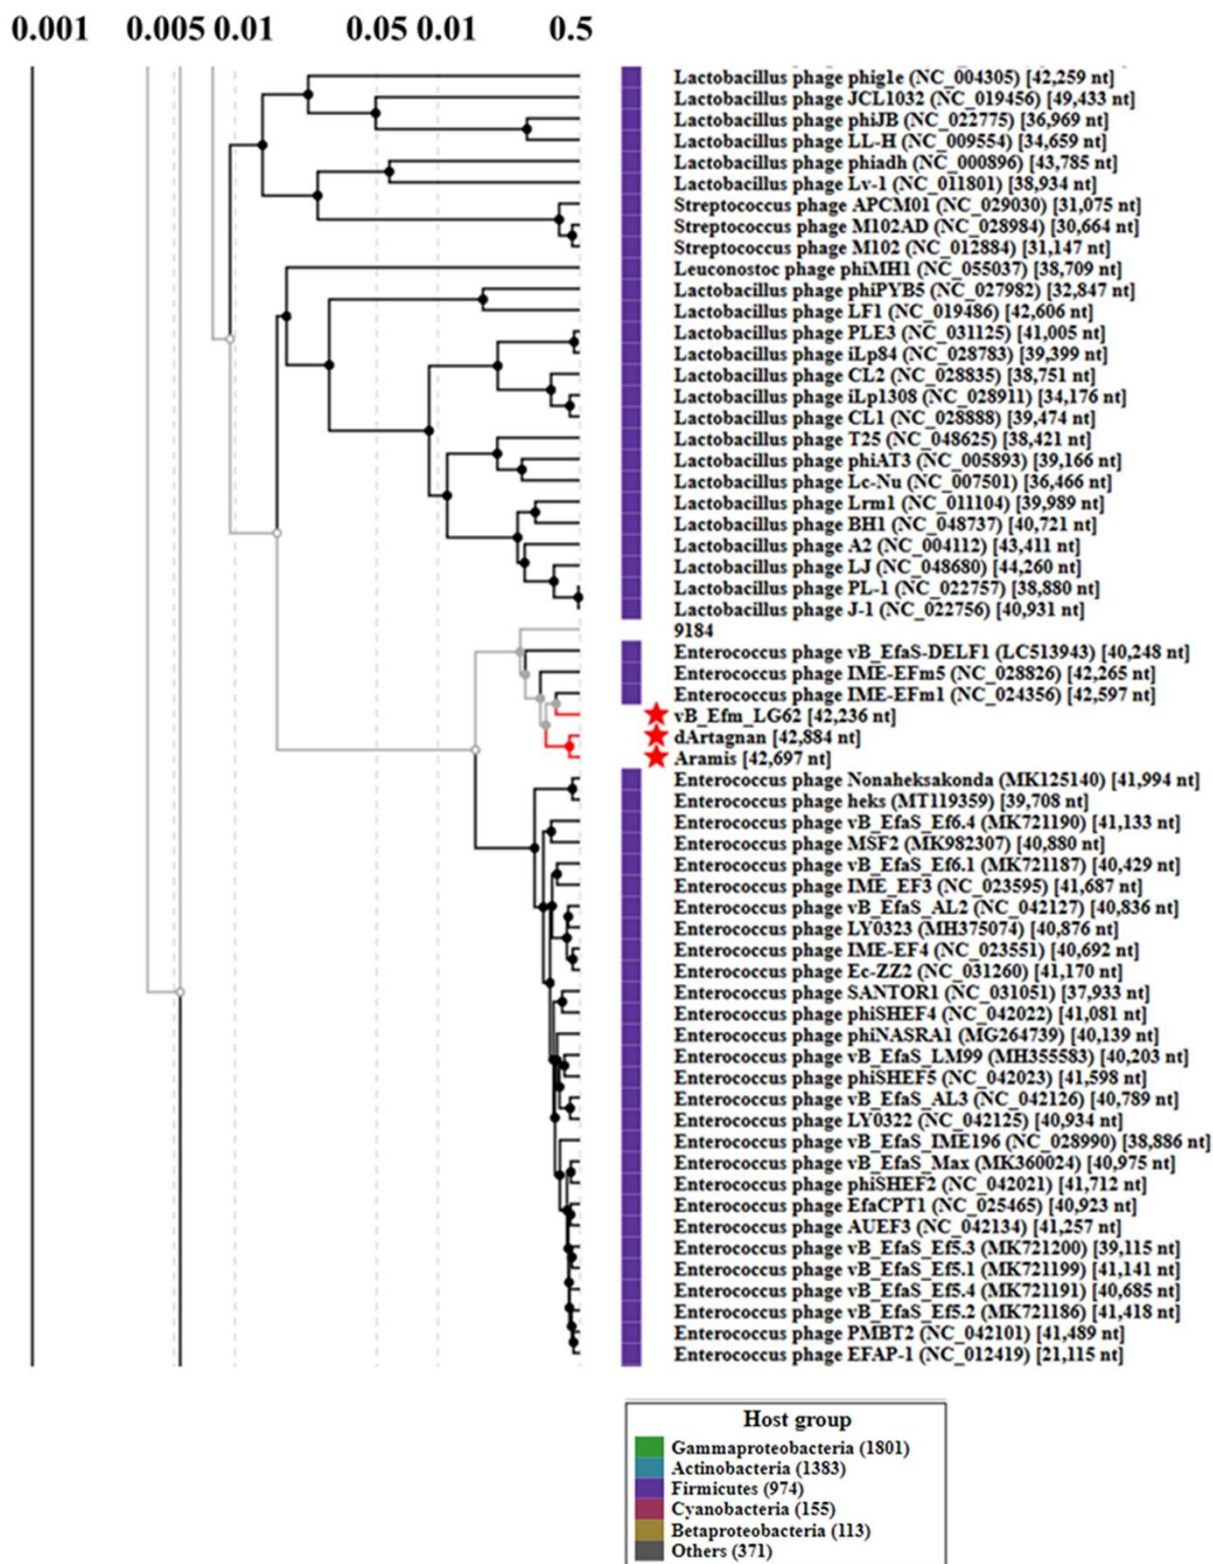

Figure S3. Placement of *Enterococcus* phages dArtagnan and Aramis in the dendrogram generated by whole proteome tBLASTx similarity with VIPTree (49). The relevant region of the tree where the siphophages are positioned is shown, and dArtagnan, Aramis and vB\_Efm\_LG62 (56) are labeled with red stars.

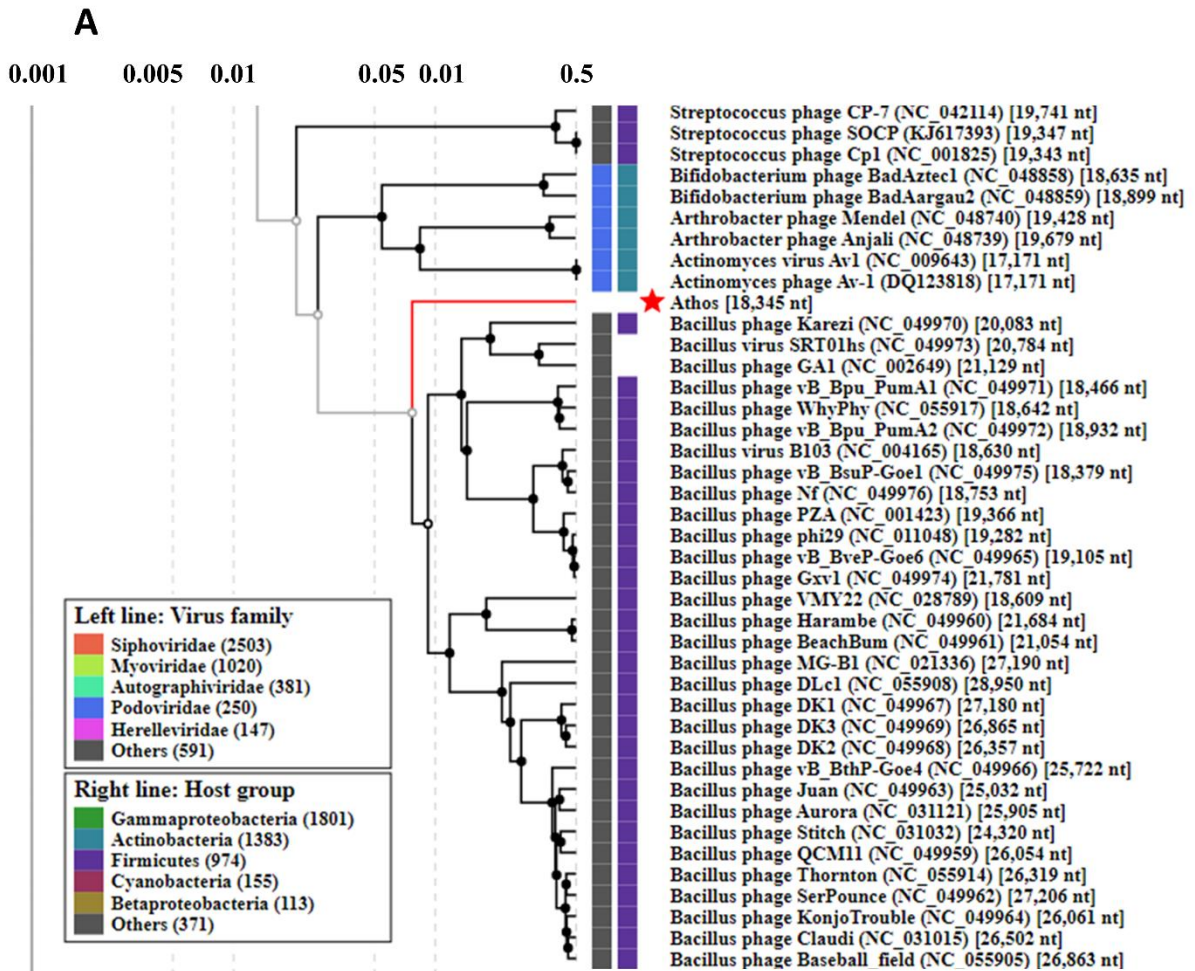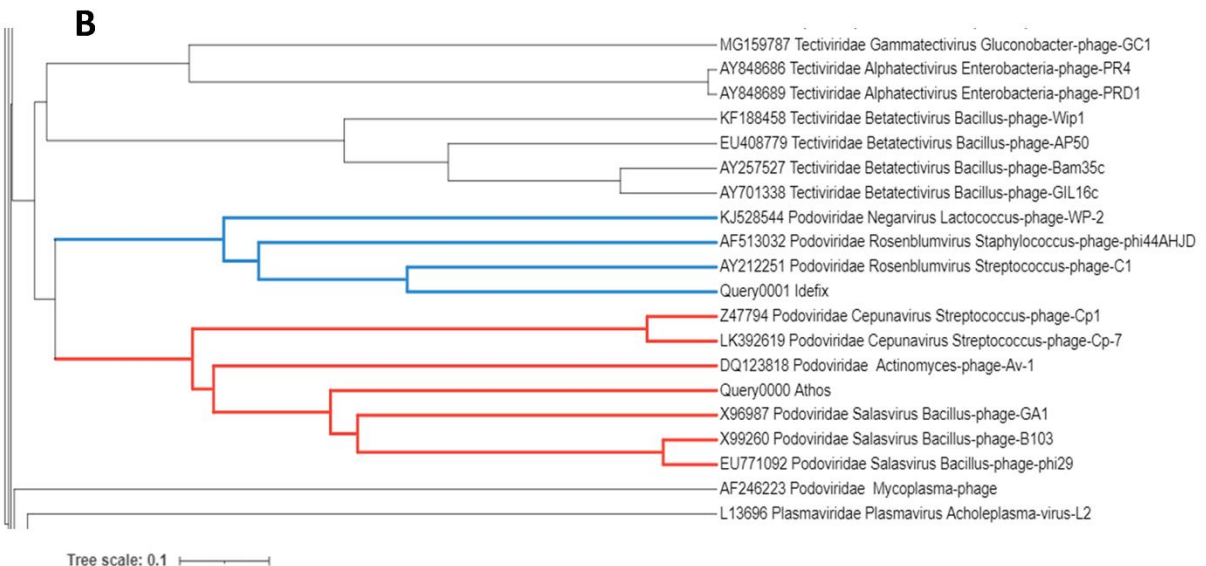

Figure S4. Placement of *Enterococcus* phage Athos in dendrograms generated with VIPTree (A) and GRAViTy (B). In the dendrogram A, generated by whole proteome tBLASTx similarity (49), only the relevant region of the tree corresponding to the *Salasmaviridae* is shown and Athos is labeled with a red star. In the dendrogram B, which is based on hidden Markov and genomic organization models (50, 51), a focus is made on the separation between the families *Rountreeviridae* in blue and *Salasmaviridae*, which includes Athos, in red.

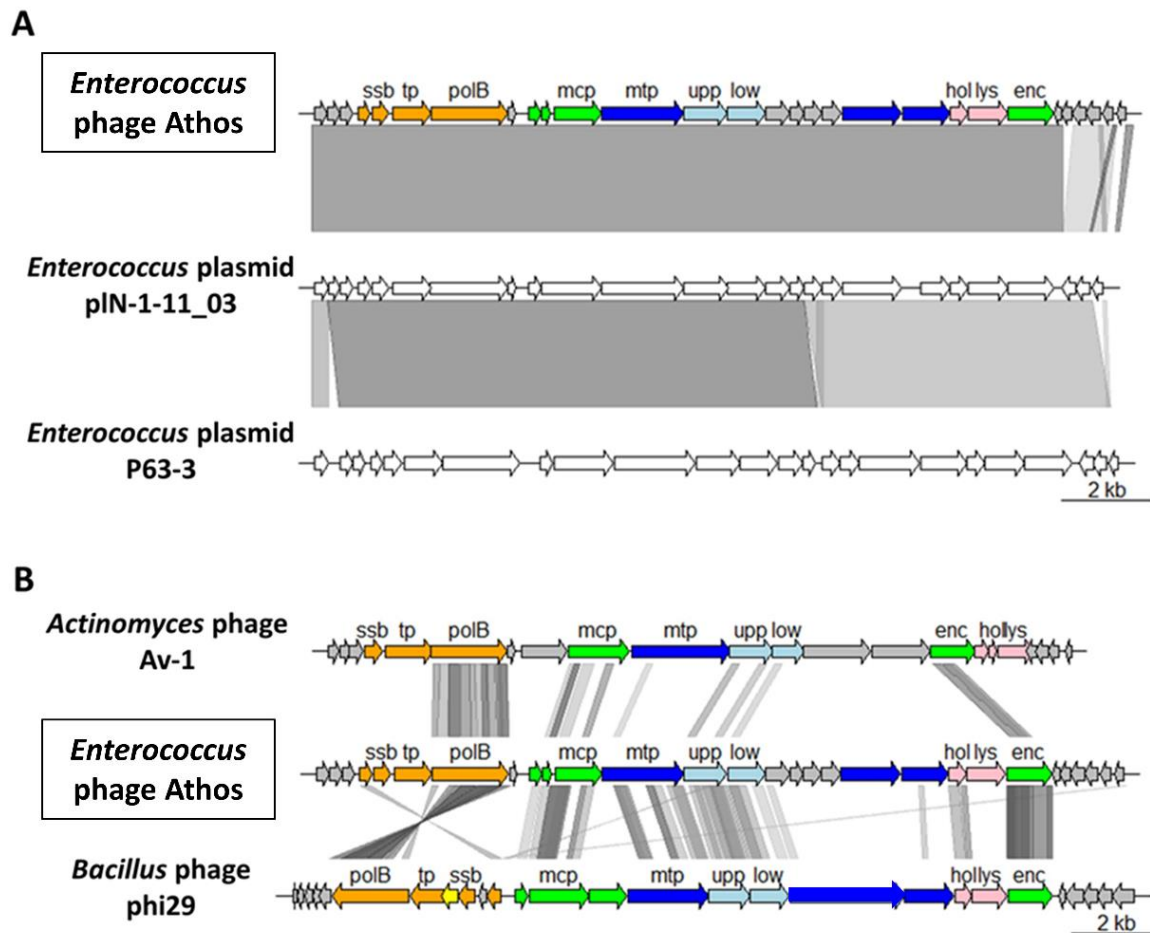

Figure S5. Annotation and comparison of *Enterococcus* phage Athos genome with “plasmids” pIN-1-11\_03 and p63-3 (A) or with *Actinomyces* phage Av-1 and *Bacillus* phage phi29 (B). Genbank accession numbers of these mobile genetic elements are listed in Table S3. Genome comparisons were performed using genoplots (46). Shaded gray lines connect regions of adjacent mobile genetic elements that have respectively BLASTn (A) or tBLASTx (B) similarity from 30% to 100% (over 100 bp for (B)). Gene functions are color-coded: orange, DNA metabolism; green, DNA packaging and head; dark blue, tail; light blue, connector; pink, lysis; yellow, transcriptional regulation; gray, hypothetical proteins; white, unannotated in A. Selected Athos genes are annotated and abbreviated: ssb, single-strand DNA-binding protein; tp, terminal protein; polB, B family polymerase; mcp, major capsid protein; mtp, major tail protein; upp, upper collar protein; low, lower collar protein; hol, holin; lys, endolysin; enc, encapsidation protein.

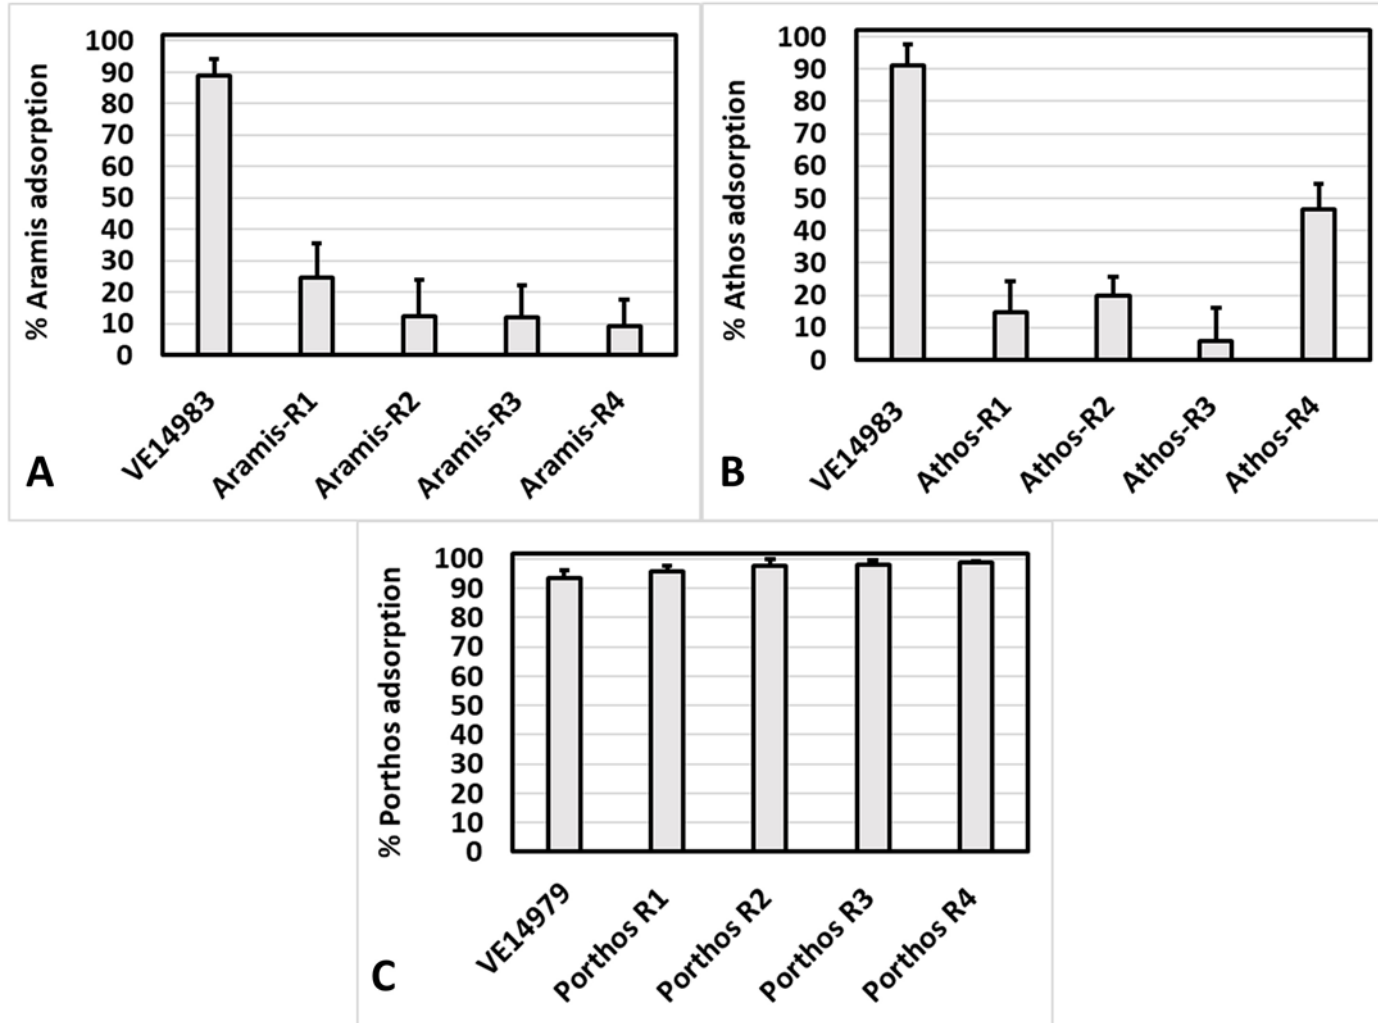

Figure S6: Adsorption of Aramis (A), Athos (B) and Porthos (C) phages to their isolation strains and their respective resistant mutants. These experiments were independently conducted at least three times and average values are given with standard deviations.

**Round 1: phage cocktail dilution rates**

|                | ND | 10 <sup>-1</sup> | 10 <sup>-2</sup> | 10 <sup>-3</sup> | 10 <sup>-4</sup> | 10 <sup>-5</sup> | 10 <sup>-6</sup> |
|----------------|----|------------------|------------------|------------------|------------------|------------------|------------------|
| VREfm isolates |    |                  |                  |                  |                  |                  |                  |
| VE14979        |    |                  |                  |                  |                  |                  |                  |
| VE14984        |    |                  |                  |                  |                  |                  |                  |
| VE14982        |    |                  |                  |                  |                  |                  |                  |
| VE14989        |    |                  |                  |                  |                  |                  |                  |
| VE14980        |    |                  |                  |                  |                  |                  |                  |
| VE14977        |    |                  |                  |                  |                  |                  |                  |
| VE14978        |    |                  |                  |                  |                  |                  |                  |
| VE14981        |    |                  |                  |                  |                  |                  |                  |

**Round 5: phage cocktail dilution rates**

|                | ND | 10 <sup>-1</sup> | 10 <sup>-2</sup> | 10 <sup>-3</sup> | 10 <sup>-4</sup> | 10 <sup>-5</sup> | 10 <sup>-6</sup> |
|----------------|----|------------------|------------------|------------------|------------------|------------------|------------------|
| VREfm isolates |    |                  |                  |                  |                  |                  |                  |
| VE14979        |    |                  |                  |                  |                  |                  |                  |
| VE14984        |    |                  |                  |                  |                  |                  |                  |
| VE14982        |    |                  |                  |                  |                  |                  |                  |
| VE14989        |    |                  |                  |                  |                  |                  |                  |
| VE14980        |    |                  |                  |                  |                  |                  |                  |
| VE14977        |    |                  |                  |                  |                  |                  |                  |
| VE14978        |    |                  |                  |                  |                  |                  |                  |
| VE14981        |    |                  |                  |                  |                  |                  |                  |

**Round 10: phage cocktail dilution rates**

|                | ND | 10 <sup>-1</sup> | 10 <sup>-2</sup> | 10 <sup>-3</sup> | 10 <sup>-4</sup> | 10 <sup>-5</sup> | 10 <sup>-6</sup> |
|----------------|----|------------------|------------------|------------------|------------------|------------------|------------------|
| VREfm isolates |    |                  |                  |                  |                  |                  |                  |
| VE14979        |    |                  |                  |                  |                  |                  |                  |
| VE14984        |    |                  |                  |                  |                  |                  |                  |
| VE14982        |    |                  |                  |                  |                  |                  |                  |
| VE14989        |    |                  |                  |                  |                  |                  |                  |
| VE14980        |    |                  |                  |                  |                  |                  |                  |
| VE14977        |    |                  |                  |                  |                  |                  |                  |
| VE14978        |    |                  |                  |                  |                  |                  |                  |
| VE14981        |    |                  |                  |                  |                  |                  |                  |

**Round 15: phage cocktail dilution rates**

|                | ND | 10 <sup>-1</sup> | 10 <sup>-2</sup> | 10 <sup>-3</sup> | 10 <sup>-4</sup> | 10 <sup>-5</sup> | 10 <sup>-6</sup> |
|----------------|----|------------------|------------------|------------------|------------------|------------------|------------------|
| VREfm isolates |    |                  |                  |                  |                  |                  |                  |
| VE14979        |    |                  |                  |                  |                  |                  |                  |
| VE14984        |    |                  |                  |                  |                  |                  |                  |
| VE14982        |    |                  |                  |                  |                  |                  |                  |
| VE14989        |    |                  |                  |                  |                  |                  |                  |
| VE14980        |    |                  |                  |                  |                  |                  |                  |
| VE14977        |    |                  |                  |                  |                  |                  |                  |
| VE14978        |    |                  |                  |                  |                  |                  |                  |
| VE14981        |    |                  |                  |                  |                  |                  |                  |

Total Lysis
  Patial Lysis
  No Lysis

Figure S7: Progression of the phage cocktail on the eight naïve development strains every five passages.

**K35.2**

| evidence           | position | mutation | annotation            | gene                                | encoded protein                           |
|--------------------|----------|----------|-----------------------|-------------------------------------|-------------------------------------------|
| <a href="#">RA</a> | 11,441   | T→C      | intergenic (-36/+40)  | <i>PORT_31</i> ← / ← <i>PORT_32</i> | Hypothetical protein/Hypothetical protein |
| <a href="#">RA</a> | 35,388   | G→A      | intergenic (-16/+293) | <i>PORT_69</i> ← / ← <i>unknown</i> | Hypothetical protein/tRNA-Gly-TCC         |
| <a href="#">RA</a> | 49,306   | T→C      | D586D (GAT→GAC)       | <i>PORT_82</i> →                    | Terminase, large subunit                  |
| <a href="#">RA</a> | 81,045   | G→A      | G2262D (GGT→GAT)      | <i>PORT_106</i> →                   | Tail fiber protein                        |
| <a href="#">RA</a> | 83,726   | G→A      | G637D (GGT→GAT)       | <i>PORT_107</i> →                   | Tail protein, putative tail fiber protein |
| <a href="#">RA</a> | 83,734   | G→A      | G640R (GGA→AGA)       | <i>PORT_107</i> →                   | Tail protein, putative tail fiber protein |
| <a href="#">RA</a> | 84,930   | G→A      | D236N (GAT→AAT)       | <i>PORT_108</i> →                   | Tail fiber protein                        |
| <a href="#">RA</a> | 106,817  | C→T      | A84V (GCT→GIT)        | <i>PORT_124</i> →                   | Putative antisigma factor                 |
| <a href="#">RA</a> | 121,753  | G→T      | E13* (GAA→JAA)        | <i>PORT_145</i> →                   | Virion structural protein with Ig domain  |

**K36.1**

| evidence           | position | mutation | annotation           | gene                                | encoded protein                           |
|--------------------|----------|----------|----------------------|-------------------------------------|-------------------------------------------|
| <a href="#">RA</a> | 11,441   | T→C      | intergenic (-36/+40) | <i>PORT_31</i> ← / ← <i>PORT_32</i> | Hypothetical protein/Hypothetical protein |
| <a href="#">RA</a> | 49,306   | T→C      | D586D (GAT→GAC)      | <i>PORT_82</i> →                    | Terminase, large subunit                  |
| <a href="#">RA</a> | 80,738   | G→A      | D2160N (GAC→AAC)     | <i>PORT_106</i> →                   | Tail fiber protein                        |
| <a href="#">RA</a> | 83,600   | G→A      | R595H (CGT→CAT)      | <i>PORT_107</i> →                   | Tail protein, putative tail fiber protein |
| <a href="#">RA</a> | 83,726   | G→A      | G637D (GGT→GAT)      | <i>PORT_107</i> →                   | Tail protein, putative tail fiber protein |
| <a href="#">RA</a> | 106,817  | C→T      | A84V (GCT→GIT)       | <i>PORT_124</i> →                   | Putative antisigma factor                 |
| <a href="#">RA</a> | 121,753  | G→T      | E13* (GAA→JAA)       | <i>PORT_145</i> →                   | Virion structural protein with Ig domain  |

**K36.3**

| evidence           | position | mutation | annotation            | gene                                | encoded protein                           |
|--------------------|----------|----------|-----------------------|-------------------------------------|-------------------------------------------|
| <a href="#">RA</a> | 35,388   | G→A      | intergenic (-16/+293) | <i>PORT_69</i> ← / ← <i>unknown</i> | Hypothetical protein/tRNA-Gly-TCC         |
| <a href="#">RA</a> | 46,070   | G→A      | H22Y (CAT→IAT)        | <i>PORT_77</i> ←                    | Hypothetical protein                      |
| <a href="#">RA</a> | 80,738   | G→A      | D2160N (GAC→AAC)      | <i>PORT_106</i> →                   | Tail fiber protein                        |
| <a href="#">RA</a> | 83,600   | G→A      | R595H (CGT→CAT)       | <i>PORT_107</i> →                   | Tail protein, putative tail fiber protein |
| <a href="#">RA</a> | 83,726   | G→A      | G637D (GGT→GAT)       | <i>PORT_107</i> →                   | Tail protein, putative tail fiber protein |
| <a href="#">RA</a> | 106,817  | C→T      | A84V (GCT→GIT)        | <i>PORT_124</i> →                   | Putative antisigma factor                 |
| <a href="#">RA</a> | 121,753  | G→T      | E13* (GAA→JAA)        | <i>PORT_145</i> →                   | Virion structural protein with Ig domain  |

**K41.1**

| evidence           | position | mutation                          | annotation             | gene                                | encoded protein                           |
|--------------------|----------|-----------------------------------|------------------------|-------------------------------------|-------------------------------------------|
| <a href="#">RA</a> | 34,164   | C→A                               | E85* (GAA→JAA)         | <i>PORT_68</i> ←                    | RNA binding protein                       |
| <a href="#">RA</a> | 34,564   | (G) <sub>11</sub> → <sub>10</sub> | intergenic (-148/+584) | <i>PORT_68</i> ← / ← <i>PORT_69</i> | RNA binding protein/Hypothetical protein  |
| <a href="#">RA</a> | 80,738   | G→A                               | D2160N (GAC→AAC)       | <i>PORT_106</i> →                   | Tail fiber protein                        |
| <a href="#">RA</a> | 83,726   | G→A                               | G637D (GGT→GAT)        | <i>PORT_107</i> →                   | Tail protein, putative tail fiber protein |
| <a href="#">RA</a> | 83,734   | G→A                               | G640R (GGA→AGA)        | <i>PORT_107</i> →                   | Tail protein, putative tail fiber protein |
| <a href="#">RA</a> | 84,930   | G→A                               | D236N (GAT→AAT)        | <i>PORT_108</i> →                   | Tail fiber protein                        |
| <a href="#">RA</a> | 106,817  | C→T                               | A84V (GCT→GIT)         | <i>PORT_124</i> →                   | Putative antisigma factor                 |
| <a href="#">RA</a> | 118,113  | C→T                               | S155L (TCA→TIA)        | <i>PORT_140</i> →                   | Single-stranded DNA binding protein       |

Figure S8. Base substitution mutations and small indels predicted in K35.2, K36.1, K36.3 and K41.1. These predictions were made by examining the pileup of the respective evolved phage cleaned reads mapped to each position in the Porthos reference genome using the consensus mode of breseq tool (52). Each mutation/indel were predicted thanks to read alignment evidence (evidence column, RA) and listed with their position in comparison with the reference genome (position column); their nature (mutation column); their consequence (annotation column, nonsense, silent and missense substitutions are respectively detailed in red, green and blue); the gene and protein concerned or the intergenic region (gene and encoded protein columns).



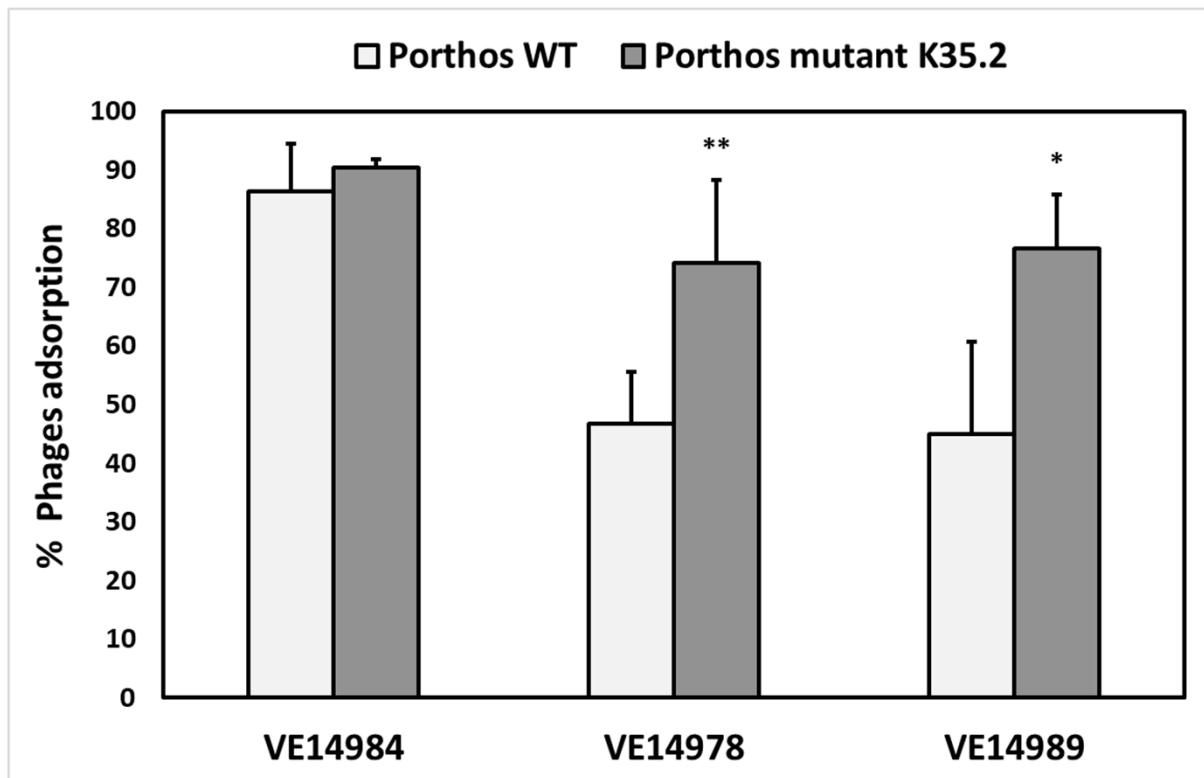

Figure S9: Adsorption of Porthos phage and its derived mutant K35.2 to the strains VE14984 (on which both phages grew as efficiently), VE14978 and VE14989 (both only sensitive to K35.2). These experiments were independently conducted four times and average values are given with standard deviations. \*,  $P < 0.05$ ; \*\*,  $P < 0.01$ ; by unilateral unpaired Student's t test.

## Supplemental tables

Table S1. Description of VREfm clinical isolates used to constitute the bacteriophage collection and evaluate phage host spectra.

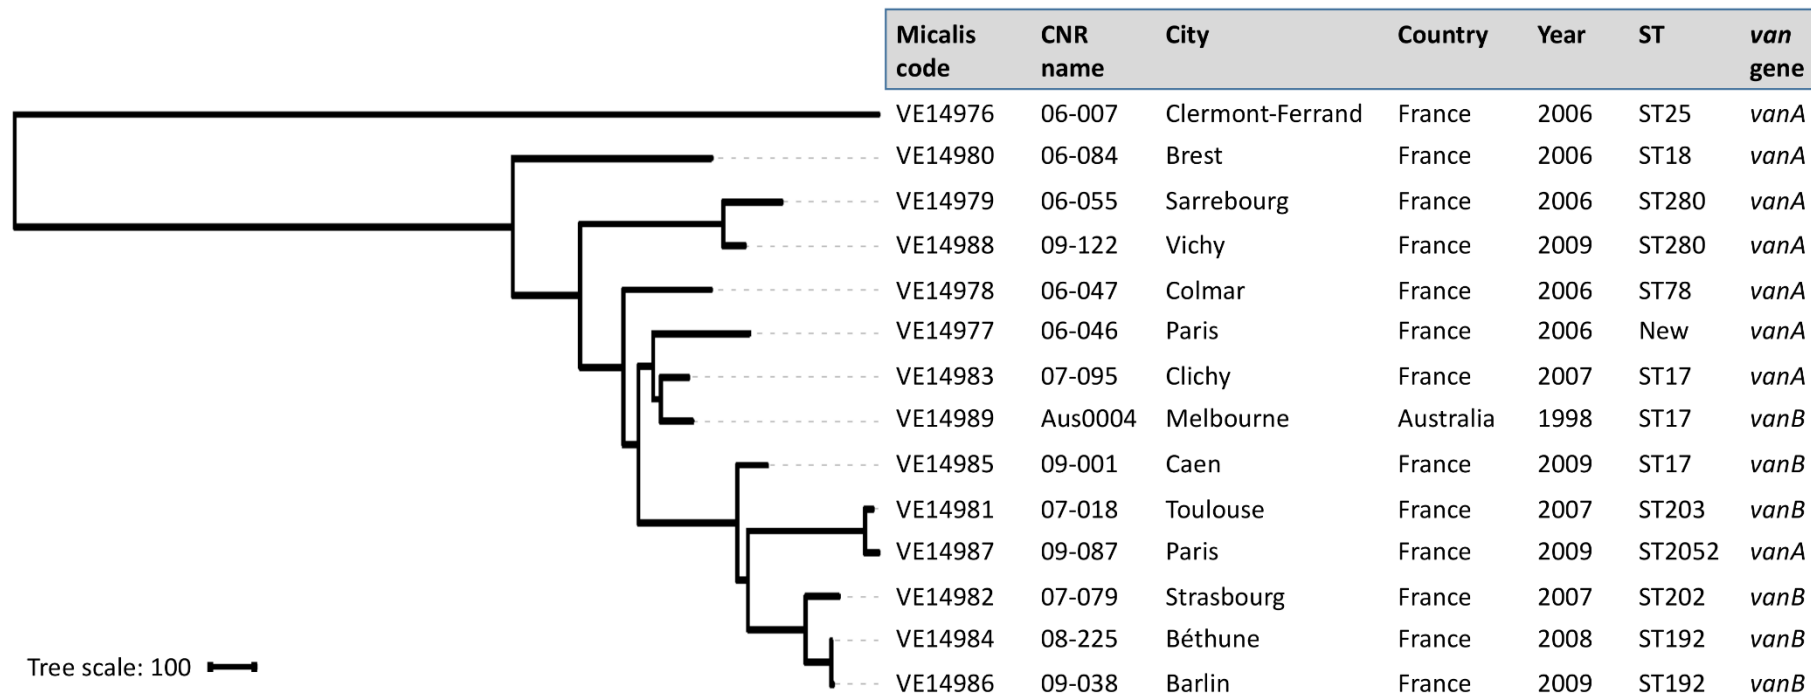

The phylogenetic neighbor-joining tree based on the core genome SNPs was generated with iTOL (31). CNR, Centre National de Référence; ST, Sequence Type; *van* gene, vancomycin-resistance operon.

Table S2. Description of *E. mundtii*, *E. durans*, *E. hirae* and *E. faecalis* strains used to evaluate the host spectra of the five natural phages characterized in details, as well as those of two of the five evolved phages emerged from the Appelmans experiment.

| Micalis Code | Reference or Source                                     | Other code | Isolation year | Origin      | Isolation country | ST  | Species            |
|--------------|---------------------------------------------------------|------------|----------------|-------------|-------------------|-----|--------------------|
| VE14732      | (90)                                                    | LMG10748T  | <1971          | Soil        | USA               |     | <i>E. mundtii</i>  |
| VE14719      | CHV (Versailles, France)                                | CHV7805    | <2004          | Clinical    | France            |     | <i>E. durans</i>   |
| VE14730      | (91)                                                    | LMG10746T  | <1937          | Dried Milk  | Unknown           |     |                    |
| VE14795      | INRA (Corte, France)                                    | CE30       | 1982           | Goat cheese | France            |     |                    |
| VE14797      | INRA (Corte, France)                                    | CE183      | 1982           | Pressure    | France            |     |                    |
| VE19203      |                                                         |            | 2020           | Poultry     | France            |     |                    |
| VE14708      | CHV (Versailles, France)                                | CHV6605    | <2004          | Clinical    | France            |     | <i>E. hirae</i>    |
| VE14731      |                                                         | LMG6399T   | <1949          | Unknown     | Unknown           |     |                    |
| VE14740      |                                                         |            | 1989           | Food        | France            |     |                    |
| VE14767      |                                                         | 23D1       | 2004           | Mouse gut   | France            |     |                    |
| VE14806      | INRA (Corte, France)                                    | CE130      | 1982           | Food        | France            |     |                    |
| VE14945      |                                                         |            | 2014           | Mouse gut   | France            |     |                    |
| VE14794      | INRA (Corte, France)                                    | CE22       | 1982           | Food        | France            | 279 | <i>E. faecalis</i> |
| VE14000      | (92)                                                    | JH2-2      | 1973           | Clinical    | UK                | 8   |                    |
| VE14001      | (93)                                                    | OG1RF      | 1978           | Clinical    | USA               | 1   |                    |
| VE14633      | INRA (Aurillac, France)                                 | 1085       | 1991           | Food        | France            | 277 |                    |
| VE14568      | Health Sciences Center (Oklahoma City, USA)             | 609        | <1992          | Clinical    | USA               | 19  |                    |
| VE14820      | AP-HP, Hôpital Européen Georges Pompidou, Paris, France |            | 2005           | Clinical    | France            | 281 |                    |
| VE14840      | (94)                                                    | F11/KA1.2  | 2005           | Food        | France            | 21  |                    |
| VE14578      | Health Sciences Center (Oklahoma City, USA)             | 647        | 1994           | Commensal   | USA               | 275 |                    |
| VE14002      | (95)                                                    |            |                | Clinical    | USA               | 6   |                    |

#### ST, Sequence Type.

90. Collins MD, Farrow JAE, Jones D. 1986. *Enterococcus mundtii* sp. nov. Int J Syst Bacteriol 36:8–12.

91. Collins MD, Jones D, Farrow JAE, Kilpper-Balz R, Schleifer KH. 1984. *Enterococcus avium* nom. rev., comb. nov.; *E. casseliflavus* nom. rev., comb. nov.; *E. durans* nom. rev., comb. nov.; *E. gallinarum* comb. nov.; and *E. malodoratus* sp. nov. Int J Syst Bacteriol 34:220–223.

92. Jacob AE, Hobbs SJ. 1974. Conjugal Transfer of Plasmid-Borne Multiple Antibiotic Resistance in *Streptococcus faecalis* var. *zymogenes*. J Bacteriol 117:360–372.

93. Dunny GM, Brown BL, Clewell DB. 1978. Induced cell aggregation and mating in *Streptococcus faecalis*: evidence for a bacterial sex pheromone. Proc Natl Acad Sci USA 75:3479–3483.

94. Jamet E, Akary E, Poisson M-A, Chamba J-F, Bertrand X, Serror P. 2012. Prevalence and characterization of antibiotic resistant *Enterococcus faecalis* in French cheeses. Food Microbiol 31:191–198.

95. Sahn DF, Kissinger J, Gilmore MS, Murray PR, Mulder R, Solliday J, Clarke B. 1989. In vitro susceptibility studies of vancomycin-resistant *Enterococcus faecalis*. Antimicrob Agents Chemother 33:1588–1591.

Table S3. Genbank accession numbers of all phage genomes and plasmids used in this study for comparative genomics and/or taxonomic classification

| <b>Phage genome</b>                     | <b>Accession number</b> |
|-----------------------------------------|-------------------------|
| <i>Enterococcus</i> phage Porthos       | LR990835                |
| <i>Enterococcus</i> phage dArtagnan     | LR991625                |
| <i>Enterococcus</i> phage Aramis        | LR990833                |
| <i>Enterococcus</i> phage Athos         | LR990834                |
| <i>Enterococcus</i> phage Planchet      | OX422066                |
| <i>Enterococcus</i> phage vB_OCPT_CCS1  | ON113170                |
| <i>Enterococcus</i> phage vB_OCPT_Ben   | MN027503                |
| <i>Enterococcus</i> phage vB_OCPT_Bop   | ON125307                |
| <i>Enterococcus</i> phage vB_OCPT_Bill  | OM966901                |
| <i>Enterococcus</i> phage phiSHEF16     | OL799260                |
| <i>Enterococcus</i> phage phiSHEF13     | OL799258                |
| <i>Enterococcus</i> phage 113           | MZ147816                |
| <i>Enterococcus</i> phage If6           | MT909815                |
| <i>Enterococcus</i> phage EFP01         | NC_047796               |
| <i>Enterococcus</i> phage PEf771        | MN241318                |
| <i>Enterococcus</i> phage EFGrNG        | MW004545                |
| <i>Enterococcus</i> phage EFGrKN        | MW004544                |
| <i>Enterococcus</i> phage GVEsP-1       | MZ333462                |
| <i>Enterococcus</i> phage EfV12-phi1    | NC_048087               |
| <i>Enterococcus</i> phage UTI-EfS3      | OL870611                |
| <i>Enterococcus</i> phage vB_EfaM_A2    | MT856905                |
| <i>Enterococcus</i> phage EFDG1         | NC_029009               |
| <i>Enterococcus</i> phage IME-EFm1      | KJ010489                |
| <i>Enterococcus</i> phage IME-EFm5      | KT588072                |
| <i>Enterococcus</i> phage vB_Efm_LG62   | OP018674                |
| <i>Enterococcus</i> phage vB_EfaS-DELFI | LC513943                |
| <i>Enterococcus</i> phage 9184          | MT939242                |
| <i>Enterococcus</i> phage 9183          | MT939241                |
| pIN-1-11_03                             | CP063571                |
| p63-3                                   | CP019991                |
| <i>Streptococcus</i> phage C1           | AY212251                |
| <i>Enterococcus</i> phage Idefix        | LT630001                |
| <i>Staphylococcus</i> phage phiP68      | AF513033                |
| <i>Streptococcus</i> phage Cp-1         | NC_001825               |
| <i>Bacillus</i> phage phi29             | NC_011048               |
| <i>Actinomyces</i> phage Av-1           | DQ123818                |

Table S4. Details about the isolation of the 21 phages isolated using VREfm isolates.

| <b><i>E. faecium</i> strain</b> | <b>Phage source</b>         | <b>Plaque morphology</b>                                   | <b>Phage number</b> |
|---------------------------------|-----------------------------|------------------------------------------------------------|---------------------|
| VE14979 (ST280)                 | Wastewater sample B2        | Clear ; $\emptyset < 1\text{mm}$                           | 2                   |
|                                 | Wastewater sample B5        | Clear ; $\emptyset < 1\text{ mm}$                          | 4 (Porthos)         |
|                                 | Wastewater sample V         | Turbid ; $\emptyset < 1\text{ mm}$                         | 5                   |
| VE14982 (ST202)                 | Wastewater sample B2        | Clear ; $\emptyset 1\text{-}2\text{ mm}$                   | 6 (dArtagnan)       |
|                                 | Wastewater sample B3        | Bull's eye morphology ; $\emptyset < 1\text{mm}$           | 7                   |
|                                 | Wastewater sample V         | Turbid ; $\emptyset < 1\text{mm}$                          | 9                   |
| VE14983 (ST17)                  | Wastewater sample B2        | Bull's eye morphology ; $\emptyset 1\text{ mm}$            | 16 (Porthos)        |
|                                 | Wastewater sample B2        | Clear ; $\emptyset 1\text{-}2\text{ mm}$                   | 26                  |
|                                 | Wastewater sample B3        | Clear ; $\emptyset 1\text{-}2\text{ mm}$                   | 21                  |
|                                 | Wastewater sample B3        | Bull's eye morphology ; $\emptyset < 1\text{-}1\text{ mm}$ | 17                  |
|                                 | Wastewater sample B5        | Clear ; $\emptyset 1\text{-}2\text{ mm}$                   | 18 (Aramis)         |
|                                 | Wastewater sample V         | Clear ; $\emptyset 1\text{-}2\text{ mm}$                   | 19                  |
| VE14984 (ST192)                 | Wastewater sample B3        | Turbid ; $\emptyset < 1\text{ mm}$                         | 23                  |
| VE14986 (ST192)                 | Wastewater sample B2        | Turbid ; $\emptyset < 1\text{ mm}$                         | 22                  |
| VE14989 (ST17)                  | Wastewater sample B2        | Turbid ; $\emptyset 1\text{-}2\text{ mm}$                  | 24                  |
|                                 | Wastewater sample B2        | Clear ; $\emptyset 1\text{-}2\text{ mm}$                   | 10                  |
|                                 | Wastewater sample B2        | Clear ; $\emptyset 2\text{-}3\text{ mm}$                   | 20                  |
|                                 | Wastewater sample B3        | Clear ; $\emptyset 3\text{ mm}$                            | 12                  |
|                                 | Wastewater sample B3        | Clear ; $\emptyset 2\text{-}3\text{ mm}$                   | 13                  |
|                                 | Wastewater sample B5        | Clear $\emptyset 2\text{-}3\text{ mm}$                     | 11                  |
| VE14980 (ST18)                  | Pig fecal virome sample VP7 | Clear $\emptyset 1\text{ mm}$                              | 27                  |

ST, sequence type;  $\emptyset$ , diameter; bull's eye morphology, plaque center clearer than the outer edges.

Table S5. Host ranges of the collection of VREfm phages.

|                 |               | VREfm isolates (Sequence Type) |                    |                   |                    |                   |                    |                    |                   |                   |                     |                   |                   |                    |                     |
|-----------------|---------------|--------------------------------|--------------------|-------------------|--------------------|-------------------|--------------------|--------------------|-------------------|-------------------|---------------------|-------------------|-------------------|--------------------|---------------------|
|                 |               | VE14979<br>(ST280)             | VE14982<br>(ST202) | VE14983<br>(ST17) | VE14984<br>(ST192) | VE14985<br>(ST17) | VE14986<br>(ST192) | VE14988<br>(ST280) | VE14989<br>(ST17) | VE14980<br>(ST18) | VE14977<br>(New ST) | VE14976<br>(ST25) | VE14978<br>(ST78) | VE14981<br>(ST203) | VE14987<br>(ST2052) |
| Isolated phages | 16 (Athos)    |                                |                    | *                 |                    |                   |                    |                    |                   |                   |                     |                   |                   |                    |                     |
|                 | 4 (Porthos)   | *                              |                    |                   |                    |                   |                    |                    |                   |                   |                     |                   |                   |                    |                     |
|                 | 2             | *                              |                    |                   |                    |                   |                    |                    |                   |                   |                     |                   |                   |                    |                     |
|                 | 18 (Aramis)   |                                |                    | *                 |                    |                   |                    |                    |                   |                   |                     |                   |                   |                    |                     |
|                 | 19            |                                |                    | *                 |                    |                   |                    |                    |                   |                   |                     |                   |                   |                    |                     |
|                 | 21            |                                |                    | *                 |                    |                   |                    |                    |                   |                   |                     |                   |                   |                    |                     |
|                 | 24            |                                |                    |                   |                    |                   |                    |                    | *                 |                   |                     |                   |                   |                    |                     |
|                 | 26            |                                |                    | *                 |                    |                   |                    |                    |                   |                   |                     |                   |                   |                    |                     |
|                 | 6 (dArtagnan) |                                | *                  |                   |                    |                   |                    |                    |                   |                   |                     |                   |                   |                    |                     |
|                 | 11            |                                |                    |                   |                    |                   |                    |                    | *                 |                   |                     |                   |                   |                    |                     |
|                 | 10            |                                |                    |                   |                    |                   |                    |                    | *                 |                   |                     |                   |                   |                    |                     |
|                 | 13            |                                |                    |                   |                    |                   |                    |                    | *                 |                   |                     |                   |                   |                    |                     |
|                 | 7             |                                | *                  |                   |                    |                   |                    |                    |                   |                   |                     |                   |                   |                    |                     |
|                 | 9             |                                | *                  |                   |                    |                   |                    |                    |                   |                   |                     |                   |                   |                    |                     |
|                 | 22            |                                |                    |                   |                    |                   | *                  |                    |                   |                   |                     |                   |                   |                    |                     |
|                 | 23            |                                |                    |                   | *                  |                   |                    |                    |                   |                   |                     |                   |                   |                    |                     |
|                 | 12            |                                |                    |                   |                    |                   |                    |                    | *                 |                   |                     |                   |                   |                    |                     |
|                 | 20            |                                |                    |                   |                    |                   |                    |                    | *                 |                   |                     |                   |                   |                    |                     |
|                 | 17            |                                |                    | *                 |                    |                   |                    |                    |                   |                   |                     |                   |                   |                    |                     |
|                 | 5             | *                              |                    |                   |                    |                   |                    |                    |                   |                   |                     |                   |                   |                    |                     |
| 27 (Planchet)   |               |                                |                    |                   |                    |                   |                    |                    | *                 |                   |                     |                   |                   |                    |                     |

Host ranges were evaluated by spot assays on the 14 VREfm isolates. Dark gray, strong lytic activity; light gray, weak lytic activity; white, no apparent productive lytic activity. Respective isolation strains are indicated by an asterisk.

Table S6. Morphological characterization of the phages in transmission electron microscopy.

| Phage number | Morphological classification | Average head diameter (sd) | Average head length (sd) | Average tail diameter (sd) | Average tail length (sd) |
|--------------|------------------------------|----------------------------|--------------------------|----------------------------|--------------------------|
| 6            | siphophage                   | 63.1 nm (1.8)              | 63.6 nm (3.1)            | 10.4 nm (1.2)              | 230.3 nm (5.0)           |
| 12           | siphophage                   | 53.9 nm (4.2)              | 53.1 nm (2.7)            | 10.5 nm (1.0)              | 210.1 nm (11.4)          |
| 18           | siphophage                   | 57.2 nm (2.3)              | 56.2 nm (2.8)            | 10.01 nm (1.6)             | 241.0 nm (4.5)           |
| 11           | siphophage                   | 59.0 nm (2.9)              | 60.2 nm (2.6)            | 11.4 nm (1.4)              | 247.8 nm (8.8)           |
| 13           | siphophage                   | 53.6 nm (4.1)              | 55.8 nm (3.4)            | 10.0 nm (1.5)              | 231.0 nm (8.6)           |
| 27           | siphophage                   | 69.6 nm (2.0)              | 71.4nm (4.2)             | 10.6 nm (0.9)              | 175.8 nm (13.2)          |
| 23           | siphophage                   | 89.0 nm (4.3)              | 85.5 nm (2.3)            | 13.7 nm (0.5)              | 455.4 nm (7.1)           |
| 2            | myophage                     | 99.1 nm (12.1)             | 99.7 nm (12.6)           | 21.3 nm (2.5)              | 232.9 nm (10.0)          |
| 4            | myophage                     | 99.1 nm (1.9)              | 100.6 nm (4.3)           | 24.1 nm (2.9)              | 230.0 nm (9.0)           |
| 16           | podophage                    | 42.0 nm (3.1)              | 64.3 nm (2.4)            | 11.1 nm (2.4)              | 29.9 nm (4.5)            |
| 7            | podophage                    | 46.4 nm (2.1)              | 63.9 nm (3.4)            | 12.5 nm (3.0)              | 33.9 nm (4.2)            |

Measurements were performed using ImageJ (37) on five virions for each phage. Average values are given with standard deviations (sd).

Table S7. Host ranges of Porthos, dArtagnan, Aramis, Planchet and Athos on a set of 21 tested enterococcal isolates other than *E. faecium*.

|                     |                           |         | Phages  |           |        |          |       |
|---------------------|---------------------------|---------|---------|-----------|--------|----------|-------|
|                     |                           |         | Porthos | dArtagnan | Aramis | Planchet | Athos |
| <b>Enterococcus</b> | <b><i>E. durans</i></b>   | VE14719 |         |           |        |          |       |
|                     |                           | VE14730 |         |           |        |          |       |
|                     |                           | VE14795 |         |           |        |          |       |
|                     |                           | VE14797 |         |           |        |          |       |
|                     |                           | VE19203 |         |           |        |          |       |
|                     | <b><i>E. hirae</i></b>    | VE14708 |         |           |        |          |       |
|                     |                           | VE14767 |         |           |        |          |       |
|                     |                           | VE14945 |         |           |        |          |       |
|                     |                           | VE14740 |         |           |        |          |       |
|                     |                           | VE14806 |         |           |        |          |       |
|                     |                           | VE14731 |         |           |        |          |       |
|                     | <b><i>E. mundtii</i></b>  | VE14732 |         |           |        |          |       |
|                     | <b><i>E. faecalis</i></b> | VE14000 |         |           |        |          |       |
|                     |                           | VE14001 |         |           |        |          |       |
|                     |                           | VE14568 |         |           |        |          |       |
|                     |                           | VE14820 |         |           |        |          |       |
|                     |                           | VE14002 |         |           |        |          |       |
|                     |                           | VE14578 |         |           |        |          |       |
|                     |                           | VE14794 |         |           |        |          |       |
|                     |                           | VE14633 |         |           |        |          |       |
|                     |                           | VE14840 |         |           |        |          |       |

Host ranges were evaluated by spot assays on five *E. durans*, six *E. hirae*, one *E. mundtii* and nine *E. faecalis* isolates. Dark gray, strong lytic activity; light gray, weak lytic activity; white, no apparent productive lytic activity.



Table S8. Theoretical spectrum of activity of the 5 phages in mixture against the panel of 14 VREfm tested, based on individual phage plaquing host ranges.

|                |         | Phages    |         |          |        |       |
|----------------|---------|-----------|---------|----------|--------|-------|
|                |         | dArtagnan | Porthos | Planchet | Aramis | Athos |
| VREfm isolates | VE14982 |           |         |          |        |       |
|                | VE14985 |           |         |          |        |       |
|                | VE14989 |           |         |          |        |       |
|                | VE14979 |           |         |          |        |       |
|                | VE14984 |           |         |          |        |       |
|                | VE14988 |           |         |          |        |       |
|                | VE14986 |           |         |          |        |       |
|                | VE14983 |           |         |          |        |       |
|                | VE14977 |           |         |          |        |       |
|                | VE14980 |           |         |          |        |       |
|                | VE14978 |           |         |          |        |       |
|                | VE14976 |           |         |          |        |       |
|                | VE14981 |           |         |          |        |       |
|                | VE14987 |           |         |          |        |       |

Host ranges were evaluated by spot assays. Dark gray, strong lytic activity; light gray, weak lytic activity; white, no apparent productive lytic activity.

Table S9. Resistance and crossed resistance evaluation of the spontaneous phage-resistant mutants to Aramis, Athos, Porthos and Planchet by spot assays.

|                                |                   | <b>Phages</b> |              |                |                 |
|--------------------------------|-------------------|---------------|--------------|----------------|-----------------|
|                                |                   | <b>Aramis</b> | <b>Athos</b> | <b>Porthos</b> | <b>Planchet</b> |
| <b>Phage-resistant mutants</b> | <b>Aramis-R1</b>  |               |              |                |                 |
|                                | <b>Aramis-R2</b>  |               |              |                |                 |
|                                | <b>Aramis-R3</b>  |               |              |                |                 |
|                                | <b>Aramis-R4</b>  |               |              |                |                 |
|                                | <b>Athos-R1</b>   |               |              |                |                 |
|                                | <b>Athos-R2</b>   |               |              |                |                 |
|                                | <b>Athos-R3</b>   |               |              |                |                 |
|                                | <b>Athos R4</b>   |               |              |                |                 |
|                                | <b>Porthos-R1</b> |               |              |                |                 |
|                                | <b>Porthos-R2</b> |               |              |                |                 |
|                                | <b>Porthos-R3</b> |               |              |                |                 |
|                                | <b>Porthos R4</b> |               |              |                |                 |

Dark gray, same amount (efficiency of plating ~10-100%) and same morphology of plaques obtained on mutants and the corresponding wild-type strain, no (significant) phage-resistance of the mutants; light gray, turbid plaques (efficiency of plating ~1%) on the spontaneous mutant compared the clear plaques obtained on the wild-type strain, weak phage-resistance of the mutant; white, no apparent productive lytic activity, strong phage-resistance of the mutants.

Table S10. Point mutations found with breseq (52) in the variable part of *epa* locus in Aramis- and Athos-respective primary adsorption resistant mutants, which were always susceptible to Porthos.

| Spontaneous phage-resistant mutant | CDS Function Position        | Mutation type | Reference | Mutation | Amino acids change                    | Resistance to Aramis Athos Porthos |
|------------------------------------|------------------------------|---------------|-----------|----------|---------------------------------------|------------------------------------|
| Aramis-R1                          | Glycosyltransferase<br>26510 | SNP           | C         | G        | Missense mutation<br>His/Asp          | +<br>+<br>-                        |
| Aramis-R2                          | O-antigen ligase<br>28641    | Del           | T         |          | Frameshift<br>Premature<br>stop codon | +<br>+<br>-                        |
| Aramis-R3                          | O-antigen ligase<br>28626    | Del           | T         |          | Frameshift<br>Premature<br>stop codon | +<br>+<br>-                        |
| Aramis-R4                          | O-antigen ligase<br>28586    | SNP           | G         | T        | Nonsense<br>mutation                  | +<br>+<br>-                        |
| Athos-R1                           | Glycosyltransferase<br>24330 | Del           | A         |          | Frameshift<br>Premature<br>stop codon | +<br>+<br>-                        |
| Athos-R2                           | Hexose epimerase<br>40220    | SNP           | G         | T        | Nonsense<br>mutation                  | +<br>+<br>-                        |
| Athos-R3                           | O-antigen ligase<br>28978    | Del           | A         |          | Frameshift<br>Premature<br>stop codon | +<br>+<br>-                        |
| Athos-R4                           | O-antigen ligase<br>28601    | Del           | A         |          | Nonsense<br>mutation                  | +/-<br>+<br>-                      |

CDS, coding sequence; SNP, single nucleotide polymorphism; Del, deletion; +, strong phage-resistance of the mutants; +/-, weak phage-resistance of the mutants; -, no (significant) phage-resistance of the mutants.

Table S11. Antibiotic susceptibility of phage-resistant *E. faecium* mutants compared to their corresponding parental strains.

| Strain     | Inhibition diameter (mm) <sup>a</sup> |     |     |     |     |     |     |     |     |     |     | MIC (mg/L) <sup>b</sup> |           |            |      |     |      |             |             |       |
|------------|---------------------------------------|-----|-----|-----|-----|-----|-----|-----|-----|-----|-----|-------------------------|-----------|------------|------|-----|------|-------------|-------------|-------|
|            | API                                   | IPM | GME | CHL | ERY | CMN | DQU | RIF | TET | NOR | SXT | VAN                     | TEC       | DAP        | TGC  | LZD | TDZ  | TEL         | DAL         | ORI   |
| VE14983 WT | 6                                     | 6   | 20  | 25  | 6   | 6   | 28  | 15  | 8   | 6   | 29  | 128                     | 64        | 4          | 0.12 | 1   | 0.25 | 1           | 0.5         | 0.01  |
| Athos-R1   | 6                                     | 6   | 23  | 26  | 6   | 6   | 31  | 17  | 8   | 6   | 30  | 128                     | <b>16</b> | <b>1</b>   | 0.06 | 1   | 0.25 | 1           | 1           | 0.01  |
| Athos-R2   | 6                                     | 6   | 22  | 25  | 6   | 6   | 30  | 16  | 8   | 6   | 30  | 64                      | <b>16</b> | <b>1</b>   | 0.06 | 1   | 0.25 | 2           | 2           | 0.01  |
| Athos-R3   | 6                                     | 6   | 20  | 25  | 6   | 6   | 29  | 16  | 7   | 6   | 30  | 64                      | <b>4</b>  | <b>0.5</b> | 0.06 | 1   | 0.25 | <b>0.25</b> | 1           | 0.01  |
| Athos-R4   | 6                                     | 6   | 22  | 25  | 6   | 6   | 28  | 14  | 8   | 6   | 28  | 64                      | <b>16</b> | 4          | 0.12 | 1   | 0.25 | 0.5         | 0.25        | <0.01 |
| Aramis-R1  | 6                                     | 6   | 23  | 27  | 6   | 6   | 30  | 15  | 9   | 6   | 28  | 128                     | <b>16</b> | <b>1</b>   | 0.06 | 1   | 0.25 | 0.5         | 0.25        | <0.01 |
| Aramis-R2  | 6                                     | 6   | 22  | 30  | 6   | 6   | 32  | 17  | 9   | 6   | 31  | 128                     | <b>8</b>  | 4          | 0.12 | 1   | 0.25 | <b>0.25</b> | <b>0.12</b> | <0.01 |
| Aramis-R3  | 6                                     | 6   | 23  | 28  | 6   | 6   | 30  | 17  | 8   | 6   | 29  | 64                      | <b>8</b>  | 4          | 0.06 | 1   | 0.25 | 1           | 0.25        | <0.01 |
| Aramis-R4  | 6                                     | 6   | 21  | 28  | 6   | 6   | 30  | 16  | 8   | 6   | 29  | 64                      | <b>8</b>  | 4          | 0.06 | 1   | 0.25 | 0.5         | 0.5         | <0.01 |
| VE14979 WT | 6                                     | 6   | 8   | 26  | 6   | 6   | 28  | 6   | 7   | 6   | 23  | >256                    | 32        | 2          | 0.25 | 2   | 0.5  | 4           | 8           | 0.06  |
| Porthos-R2 | 6                                     | 6   | 6   | 28  | 6   | 6   | 30  | 6   | 8   | 6   | 25  | >256                    | 16        | 2          | 0.12 | 2   | 0.25 | 4           | 4           | 0.03  |

<sup>a</sup>Antibiotics tested by disk diffusion: API, ampicillin; CHL, chloramphenicol; CMN, clindamycin; DQU, dalfopristin-quinupristin; ERY, erythromycin; GME, gentamicin; NOR, norfloxacin; IPM, imipenem; RIF, rifampicin; SXT, cotrimoxazole; TET, tetracycline.

<sup>b</sup>Antibiotics tested by MIC determination: DAL, dalbavancin; DAP, daptomycin; LZD, linezolid; ORI, oritavancin; TDZ, tedizolid; TEC, teicoplanin; TEL, telavancin; TGC, tigecycline; VAN, vancomycin. Significant changes in MICs ( $\geq 4$  fold) are indicated in bold.

Table S12 Emergence of VE14983 spontaneous CFUs following teicoplanin, Aramis and teicoplanin/Aramis exposures.

| <b>Exposure</b>                                            | Teicoplanin<br>(64 µg/mL)       | Aramis phage<br>(MOI ~ 50)     | Teicoplanin (64 µg/mL)<br>Aramis phage (MOI ~ 50) |
|------------------------------------------------------------|---------------------------------|--------------------------------|---------------------------------------------------|
| <b>Frequency of emergence<br/>of spontaneous CFUs (sd)</b> | 1.25 (± 0.6) x 10 <sup>-5</sup> | 2.6 (± 1.9) x 10 <sup>-5</sup> | 0                                                 |

The frequency of emergence of VE14983 spontaneous CFUs was estimated following three independent experiments and average values are given with standard deviations (sd).

Table S13. Isolated and purified phages from the evolved cocktail per development strain.

| <b>Development strain</b> | <b>Number of isolated and purified phages from the evolved cocktail</b> |
|---------------------------|-------------------------------------------------------------------------|
| VE14979                   | 2                                                                       |
| VE14984                   | 3                                                                       |
| VE14982                   | 3                                                                       |
| VE14989                   | 1                                                                       |
| VE14980                   | 3                                                                       |
| VE14977                   | 0                                                                       |
| VE14978                   | 3                                                                       |
| VE14981                   | 3                                                                       |

Table S14. Comparison between the host ranges of the wild-type phages present in the cocktail at the starting point and those of the 18 phages purified from the cocktail at the ending point.

| Isolate      | Wild type phage in the starting cocktail |            |           |            | Purified phages from the evolved cocktail |            |           |            |            |            |            |           |           |           |           |           |           |           |           |        |           |           |           |
|--------------|------------------------------------------|------------|-----------|------------|-------------------------------------------|------------|-----------|------------|------------|------------|------------|-----------|-----------|-----------|-----------|-----------|-----------|-----------|-----------|--------|-----------|-----------|-----------|
|              | Porthos                                  | dArtagnan  | Aramis    | Planchet   | K.35.1                                    | K.35.2     | K.35.3    | K.36.1     | K.36.3     | K.41.1     | K.41.2     | K.41.3    | K.39.1    | K.39.2    | K.39.3    | K.46.1    | K.37.1    | K.37.2    | K.37.3    | K.38.1 | K.38.2    | K.38.3    |           |
| VE14979      | Dark gray                                |            |           |            | Dark gray                                 | Dark gray  | Dark gray | Dark gray  | Dark gray  | Dark gray  |            | Dark gray |           |           |           |           |           |           |           |        |           |           |           |
| VE14984      | Dark gray                                | Light gray |           |            | Dark gray                                 | Dark gray  | Dark gray | Dark gray  | Dark gray  | Dark gray  | Dark gray  | Dark gray | Dark gray | Dark gray | Dark gray | Dark gray |           |           |           |        |           |           |           |
| VE14982      |                                          | Dark gray  |           |            |                                           |            |           |            |            | Light gray |            |           | Dark gray | Dark gray | Dark gray | Dark gray |           |           |           |        |           |           |           |
| VE1989       |                                          | Dark gray  | Dark gray |            |                                           | Dark gray  |           | Light gray | Light gray | Light gray | Light gray |           | Dark gray | Dark gray | Dark gray | Dark gray |           |           |           |        | Dark gray | Dark gray | Dark gray |
| VE14980      |                                          |            |           | Dark gray  |                                           | Light gray |           | Light gray | Light gray |            | Dark gray  |           |           |           |           |           | Dark gray | Dark gray | Dark gray |        |           |           |           |
| VE14977      |                                          |            |           | Light gray |                                           |            |           |            |            |            |            |           |           |           |           |           |           | Dark gray | Dark gray |        |           |           |           |
| VE14978      |                                          |            |           | Light gray | Dark gray                                 |            | Dark gray | Dark gray  | Dark gray  | Light gray |            |           |           |           |           |           |           |           |           |        |           |           |           |
| VE14981      |                                          |            |           |            |                                           |            |           |            |            |            |            |           |           |           |           |           |           |           |           |        | Dark gray | Dark gray | Dark gray |
| <b>Total</b> | 2                                        | 3          | 1         | 2          | 3                                         | 5          | 2         | 5          | 5          | 5          | 3          | 2         | 3         | 3         | 3         | 3         | 1         | 2         | 2         | 2      | 2         | 2         | 2         |

Host ranges were evaluated by spot assays on the eight development strains used during the evolution experiment. Dark gray, strong lytic activity; light gray, weak lytic activity; white, no apparent productive lytic activity.

Table S15. Comparison between the host ranges of the wild-type phages present in the cocktail at the starting point and those of the five selected evolved phages purified from the cocktail at the ending point.

|                     |              | Wild type phages |            |           |            | Evolved phages |            |            |            |           |
|---------------------|--------------|------------------|------------|-----------|------------|----------------|------------|------------|------------|-----------|
|                     |              | Porthos          | dArtagnan  | Aramis    | Planchet   | K35.2          | K36.1      | K36.3      | K41.1      | K38.2     |
| Development strains | VE14979      | Dark gray        | White      | White     | White      | Dark gray      | Dark gray  | Dark gray  | Dark gray  | White     |
|                     | VE14984      | Dark gray        | Light gray | White     | White      | Dark gray      | Dark gray  | Dark gray  | Dark gray  | White     |
|                     | VE14982      | White            | Dark gray  | White     | White      | White          | White      | White      | Light gray | White     |
|                     | VE14989      | White            | Dark gray  | Dark gray | White      | Dark gray      | Light gray | Light gray | Light gray | Dark gray |
|                     | VE14980      | White            | White      | White     | Dark gray  | Light gray     | Light gray | Light gray | White      | White     |
|                     | VE14977      | White            | White      | White     | Light gray | White          | White      | White      | White      | White     |
|                     | VE14978      | White            | White      | White     | White      | Dark gray      | Dark gray  | Dark gray  | Light gray | White     |
|                     | VE14981      | White            | White      | White     | White      | White          | White      | White      | White      | Dark gray |
| Remaining strains   | VE14988      | Dark gray        | White      | White     | White      | Dark gray      | Dark gray  | Dark gray  | Dark gray  | White     |
|                     | VE14986      | Dark gray        | White      | White     | White      | Dark gray      | Dark gray  | Dark gray  | Dark gray  | White     |
|                     | VE14983      | Light gray       | White      | Dark gray | Dark gray  | Dark gray      | Dark gray  | Dark gray  | Dark gray  | Dark gray |
|                     | VE14985      | White            | Light gray | White     | Light gray | White          | White      | White      | Light gray | White     |
|                     | VE14976      | White            | White      | White     | White      | Dark gray      | Light gray | Light gray | Light gray | White     |
|                     | VE14987      | White            | White      | White     | White      | White          | White      | White      | White      | White     |
|                     | <b>Total</b> | <b>5</b>         | <b>4</b>   | <b>2</b>  | <b>4</b>   | <b>9</b>       | <b>9</b>   | <b>9</b>   | <b>10</b>  | <b>3</b>  |

Host ranges were evaluated by spot assays on both the eight development strains and the remaining VREfm strains from our collection that were not used for the evolution experiment. Dark gray, strong lytic activity; light gray, weak lytic activity; white, no apparent productive lytic activity.



Table S16. Comparison between the host ranges of Porthos and its derivatives K35.2 and K41.1 on enterococci species distinct from *E. faecium*.

|                     |                           |         | WT      | Mutants |       |
|---------------------|---------------------------|---------|---------|---------|-------|
|                     |                           |         | Porthos | K35.2   | K41.1 |
| <b>Enterococcus</b> | <b><i>E. durans</i></b>   | VE14719 |         |         |       |
|                     |                           | VE14730 |         |         |       |
|                     |                           | VE14795 |         |         |       |
|                     |                           | VE14797 |         |         |       |
|                     |                           | VE19203 |         |         |       |
|                     | <b><i>E. hirae</i></b>    | VE14708 |         |         |       |
|                     |                           | VE14767 |         |         |       |
|                     |                           | VE14945 |         |         |       |
|                     |                           | VE14740 |         |         |       |
|                     |                           | VE14806 |         |         |       |
|                     |                           | VE14731 |         |         |       |
|                     | <b><i>E. mundtii</i></b>  | VE14732 |         |         |       |
|                     | <b><i>E. faecalis</i></b> | VE14000 |         |         |       |
|                     |                           | VE14001 |         |         |       |
|                     |                           | VE14568 |         |         |       |
|                     |                           | VE14820 |         |         |       |
|                     |                           | VE14089 |         |         |       |
|                     |                           | VE14578 |         |         |       |
|                     |                           | VE14794 |         |         |       |
|                     |                           | VE14633 |         |         |       |
| VE14840             |                           |         |         |         |       |

Host ranges were evaluated by spot assays on five *E. durans*, six *E. hirae*, one *E. mundtii* and nine *E. faecalis* isolates. Dark gray, strong lytic activity; light gray, weak lytic activity; white, no apparent productive lytic activity.
